# Supplementary material for: Integration of melt electrowritten microfibers with magnetoelastic sensors for continuous monitoring of cell growth
Source: Royal Society of Chemistry journal article supplement (doi:10.1039/d4sd00039k), 2024-01-01

### Integration of MEW with ME - Supplementary Information

Examples of Raw Resonance Spectra Collected:

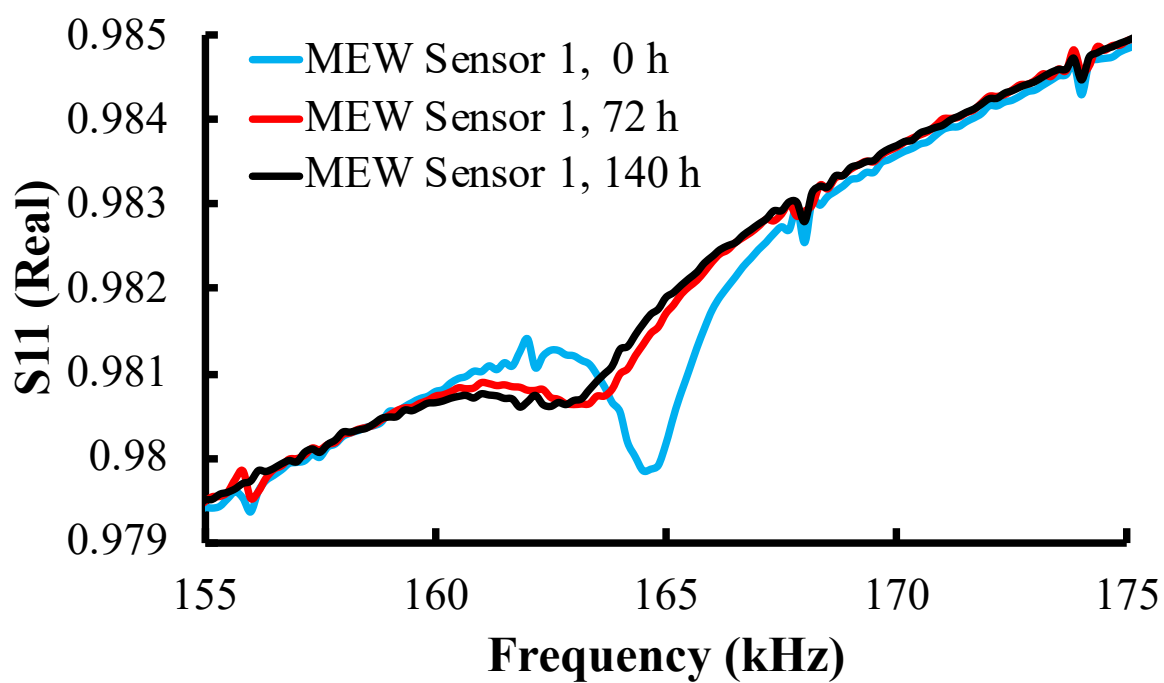

Supplement: d4sd00039k1.pdf [file d4sd00039k1.pdf]
